# Supplementary material
Source: publisher figshare collection journal article supplement (https://acs.figshare.com/ndownloader/files/4626361)
Supplement: Supplementary file 1 [file 4626361]

## Supporting Information

to

### Coating of vesicles with hydrophilic reactive polymers

Čestmír Koňák,<sup>1</sup> Vladimír Šubr,<sup>1</sup> Libor Kostka,<sup>1</sup> Petr Štěpánek,<sup>\*1</sup> Karel Ulbrich,<sup>1</sup> and

Helmut Schlaad<sup>2</sup>

<sup>1</sup> *Institute of Macromolecular Chemistry, Academy of Sciences of the Czech Republic, Heyrovsky Sq. 2, 162 06 Prague 6, Czech Republic.* <sup>2</sup> *Max Planck Institute of Colloids and Interfaces, Colloid Chemistry, Research Campus Golm, 14424 Potsdam, Germany.*

#### Calculation of the amount of bound coating polymer

Without coating,  $M_w^v$  was calculated from

$$R^v(q^2) = K c_v P^v(q^2) M_w^v \quad (1)$$

and after coating with pHPMA copolymers, saturated  $M_{wa}^c$  of vesicles was calculated from

$$R^c(q^2) = K c_v P^c(q^2) M_{wa}^c \quad (2)$$

where  $R(q^2)$  is the Rayleigh ratio of the scattering intensity,  $K$  is a contrast factor containing the optical parameters,  $c_v$  is the vesicle concentration,  $M_{wa}^c$  is the apparent weight-average of molecular weight of vesicles after coating calculated using  $c_v$ ,  $P(q^2)$  is the vesicle scattering function dependent on the size and structure of nanoparticles and  $q$  is the scattering vector.

Dividing (A2) with (A1):

$$R^c(q^2) / R^v(q^2) = (1 + (\Delta M_{wa}^c / M_w^v)) P^c(q^2) / P^v(q^2), \quad (3)$$

where

$$M_{wa}^c = M_w^v + \Delta M_{wa}^c \quad (4)$$

Since the size of nanoparticles changes only slightly by polymer coating we can assume that also the  $P(q^2)$  function changes only slightly, therefore the Taylor expansion can be applied for  $P_2(\theta)/P_1(\theta)$ , then

$$R^c(q^2)/R^v(q^2) \cong 1 + (\Delta M_{wa}^c / M_w^v) + Aq^2 + Bq^4 \quad (5)$$

The relative change of the vesicle molecular weight  $1 + \Delta M_{wa}^c / M_w^v$  can be obtained by linear or quadratic fits to the experimental ratio  $R^c(q^2)/R^v(q^2)$ . The zero angle limit of  $R^c(q^2)/R^v(q^2)$  equals  $1 + (\Delta M_{wa}^c / M_w^v)$ ; for low concentrations  $\Delta M_w^c \cong \Delta M_{wa}^c$ .

Examples of the procedure application are shown in Figure SI-1:

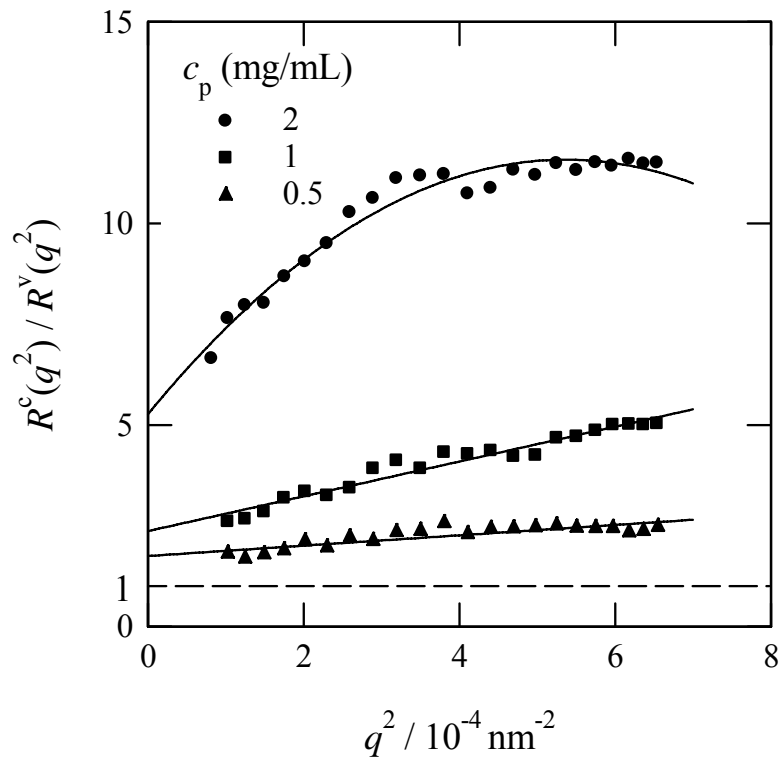

**Figure SI-1.** Plot of  $R^c(q^2)/R^v(q^2)$  vs.  $q^2$  for vesicles **2** coated with the positively charged PHPMA-TT **II** polymer. Concentration of coating polymer is shown in the legend. The solid lines are the best linear and quadratic fits to experimental results.
